# Supplementary material for: Designing a solar interfacial evaporator based on tree structures for great coordination of water transport and salt rejection
Source: Royal Society of Chemistry journal article supplement (doi:10.1039/d2mh01447e), 2023-01-01
Supplement: d2mh01447e1.pdf [file d2mh01447e1.pdf]

Electronic Supplementary Information

**Designing a solar interfacial evaporator based on tree structures for great coordination of water transport and salt rejection**

Zhicheng Xu<sup>a</sup>, Xueqin Ran<sup>a</sup>, Zhijie Zhang<sup>a\*</sup>, Mingfeng Zhong<sup>a</sup>, Da Wang<sup>b</sup>, Pengping Li<sup>c</sup>, Zhihong Fan<sup>c</sup>

a. School of Materials Science and Engineering, South China University of Technology, Guangzhou 510640, China

b. School of Physics and Optoelectronics, South China University of Technology, Guangzhou 510640, China

c. Key Laboratory of Harbor and Marine Structure Durability Technology Ministry of Communications, Guangzhou 510230, China

\*Corresponding author. E-mail address: [imzhang@scut.edu.cn](mailto:imzhang@scut.edu.cn) (Zhijie Zhang)

**This PDF file includes:**

S1. Materials and Methods

S2. Numerical Simulation

S3. Supplementary Figures and Tables

S4. References

## 23 **S1 Materials and Methods**

### 24 **S1.1 Materials**

25 Kaolin powder was provided by Guangdong Changlong Ceramics Co. LTD, and it  
26 was dried at 120 °C for 12 hours and sifted through 200 mesh before use. Calcium  
27 phosphate was purchased from Tianjin Kemiou Chemical Reagent Co. Ltd. Sodium  
28 hexametaphosphate was purchased from Tianjin Fuchen Chemical Reagent Co. LTD.  
29 Food grade bacterial cellulose hydrogel was purchased from Jinan Jinhuaifang Food  
30 Technology Co. LTD and was broken in a blender before use. The multilayer graphene  
31 oxide (MGO) was provided by Soochow Hengqiu Graphene Technology Co. Ltd.  
32 Sodium dodecyl sulfate and polyacrylamide were supplied by Shanghai Macklin  
33 Biochemical Co. Ltd. NaCl was obtained from Sinopharm Chemical Reagent Co. Ltd.

### 34 **S1.2 Preparation of porous ceramic and MGO dispersion**

35 The ceramic particles consist of kaolin, calcium phosphate and sodium  
36 hexametaphosphate in a mass percentage of 93:6:1. In order to obtain a stable and  
37 highly dispersed slurry, we used bacterial cellulose (BC) hydrogel with a water content  
38 of 99.64 % as the dispersion medium. The ceramic aggregate and bacterial cellulose are  
39 mixed evenly in a teflon mill pot and ball-milled for 3.5 hours at 350 rpm. The ceramic  
40 aggregate content was adjusted between 15 wt% and 30 wt%. For comparison, BC and  
41 pure water were used as dispersion mediums (the slurries obtained were marked as BC,  
42 H<sub>2</sub>O) to demonstrate the stability of the slurry, their solid contents were set as 15 wt%.  
43 The uniform slurry was then poured into a homemade mold for freeze-drying (Fig S1a,  
44 -45 °C is provided by the cold trap of the Freeze dryer to prepare short ceramic, and -  
45 78 °C is provided by dry ice-frozen ethanol solution to prepare long ceramic) on Freeze  
46 dryer (FD-1A-50) for 4 days. The dry ceramic billet was then kept at 500 °C for 1 hour  
47 to remove the organic matter, and then sintered at 1250 °C for 90 minutes to obtain the  
48 required porous ceramics. Before all the tests, we have cut off 3 mm of the bottom of  
49 the sintered ceramic along the Gradient direction.

50 For MGO dispersion, 0.02 g MGO and 0.004 g sodium dodecyl sulfate were added  
51 to 2 ml deionized water for ultrasonic treatment for 15 minutes. Finally, the disperse

52 solution is evenly applied to the surface of the ceramic with a brush and then dried  
53 naturally.

### 54 **S1.3 Water absorption.**

55 Cut off 3 mm of the bottom of the sintered ceramic along the Gradient direction,  
56 and then cut 6.5 cm upward to get the sample for capillary water absorption test, the  
57 sample were marked as (Solid content)-Direction like 15 wt%-Gradient. As shown in  
58 Fig S1b, the ceramic was hung on an iron wire to a hook at the bottom of the electronic  
59 balance plate and the water in the petri dish was lifted by a lifting platform, which  
60 submerge the bottom of the ceramic by 3 mm. The electronic balance was connected to  
61 a computer to record the changes in the quality data.

### 62 **S1.4 Evaporation test.**

63 As shown in Fig S1c, the porous ceramic was clamped by a foam so that it can  
64 float on the water. The simulated solar light was provided by xenon lamp (CHF-  
65 XM500, the wavelength spectrum ranges from 200 to 1100 nm.) equipped with an  
66 AM1.5 filter. The mass change was recorded by a weighing balance and the temperature  
67 was recorded by infrared thermal imager (FLIR E4). The solar evaporation experiments  
68 were carried out under the environment of  $25 \pm 2$  °C and  $50 \pm 5$  % relative humidity.  
69 The same procedure was carried out at the same environment without the solar steam  
70 generator or in dark conditions.

### 71 **S1.5 Measurement of open porosity**

72 The mean open porosity of porous ceramic was measured by gravimetric test  
73 method and the porosity can be calculated by the following formula:

$$74 \quad \varepsilon = \frac{m}{\rho AL} \quad (S1)$$

75 where  $\varepsilon$  is the porosity,  $m$  is the mass of water soaked by porous ceramic (measured by  
76 a weighing balance (PTX-FA210S),  $\rho$  is the density of water,  $L$  is the height of the  
77 porous ceramic and  $A$  is the cross-sectional area, which can be calculated by measuring  
78 the radius of the ceramics with vernier calipers.

## 79 **S1.6 Characterization**

80 The morphologies were observed by scanning electron microscopy (SEM, NOVA  
81 NANOSEM 430), Micro-CT (Quantum GX II) and high-resolution transmission  
82 electron microscope (JEM-2100F). The phase composition of the material was detected  
83 by XRD (X'Pert PRO MPD). The light absorption was measured by UV/VIS/NIR  
84 spectrometer (Lambda 750S, PerkinElmer, America). The metal ions concentration was  
85 measured by ICP-OES (Optima 8300).

## 86 **S1.7 Calculation of evaporation rate and solar energy utilization** 87 **efficiency**

88 In our study, the evaporation rate was calculated in terms of the projected area ( $A$ ),  
89 which is equal to the area of the circular cross section at the top of the ceramic. The  
90 solar energy utilization efficiency of the solar steam generator was calculated as the  
91 percentage of the energy that used for water evaporation compared to the energy  
92 irradiated to the evaporation surface. The general calculation formula is as follows:

$$93 \quad \eta = \Delta \dot{m} H_{Lv} / P_{in} \quad (S2)$$

94 where  $\eta$  is the solar energy utilization efficiency,  $\Delta \dot{m}$  is the net water mass-change rate  
95 given by  $\Delta \dot{m} = \dot{m}_{w/evaporate \text{ under sun}} - \dot{m}_{w/evaporate \text{ in dark}}$  with a unit of  $\text{kg m}^{-2} \text{ h}^{-1}$ ,  
96  $H_{Lv}$  is the enthalpy of liquid-vapor phase transition at the operation temperature (we  
97 used  $2400 \text{ J g}^{-1}$  in our calculations) and  $P_{in}$  is the intensity of simulated solar light  
98 irradiation. Because the test was carried out when the evaporation surface was heated  
99 to a stable temperature, the sensible heat was ignored.

## 100 **S2 Numerical simulation**

### 101 **S2.1 Capillary suction**

#### 102 **S2.1.1 Geometry and mesh generation**

103 The geometries were created in the software DesignModeler and the software Mesh  
104 was used to carried out mesh generation. The sizes of the capillaries and the mesh are

105 shown in Fig. S2a. To solve the initial saturation mutation problem at inlet and reduce  
 106 the disturbance at the outlet, denser meshes were set near approaching the bottom and  
 107 the top of the models. Because the calculation is simple, a smaller mesh size was used  
 108 to ensure the accuracy of the calculation. As a result, the elements of the three models  
 109 are: 4686 for Gradient-OD, 3318 for Isodiametric and 4686 for Gradient.

## 110 **S2.1.2 Mathematical model, volume of fluid (VOF) method and** 111 **boundary condition**

112 We used commercial software Fluent 19.0 to understand the process of capillary  
 113 suction. Fluent is one of the most commonly used fluid dynamics simulation software.  
 114 It employs a simple and fast finite volume method to solve the governing equations and  
 115 produce the distribution field of relevant physical quantities. Capillary suction is a two-  
 116 phase flow problem. In a hydrophilic capillary, the wetting phase (water) will displace  
 117 the non-wetting phase (air). An interface exists between two immiscible fluids and we  
 118 can track it by solving the Navier-Stokes equation and momentum equation:

119 Continuity:

$$120 \quad \frac{\partial \rho}{\partial t} + \frac{\partial(\rho u)}{\partial x} + \frac{\partial(\rho v)}{\partial y} = 0 \quad (S3)$$

121 X-momentum:

$$122 \quad \frac{\partial(\rho u)}{\partial t} + \frac{\partial(\rho uu)}{\partial x} + \frac{\partial(\rho uv)}{\partial y} = -\frac{\partial P}{\partial x} + \left[ \frac{\partial}{\partial x} \left( \mu \frac{\partial u}{\partial x} \right) + \frac{\partial}{\partial y} \left( \mu \frac{\partial u}{\partial y} \right) \right] + S_x \quad (S4)$$

123 Y-momentum:

$$124 \quad \frac{\partial(\rho v)}{\partial t} + \frac{\partial(\rho vu)}{\partial x} + \frac{\partial(\rho vv)}{\partial y} = -\frac{\partial P}{\partial y} + \left[ \frac{\partial}{\partial x} \left( \mu \frac{\partial v}{\partial x} \right) + \frac{\partial}{\partial y} \left( \mu \frac{\partial v}{\partial y} \right) \right] + S_y \quad (S5)$$

125 here  $u$  and  $v$  are the fluid velocity component in x-direction and y-direction,  $\rho$  is the  
 126 fluid density,  $\mu$  is the viscosity and  $P$  is the pressure. In the momentum equation,  $S_x$   
 127 and  $S_y$  are the source terms that include the contribution of gravity and surface tension.

128 In 1981, Hirt et al used the volume of fluid (VOF) method to track an interface  
 129 firstly. They tracked the volume fraction of each phase instead of the interface itself,

130 and the interface was reconstructed from the values of volume fraction.<sup>1, 2</sup> In order to  
 131 track the interface between two immiscible fluids, the VOF method uses a color  
 132 function which have a value varying from 0 to 1 (0 and 1 represent the control volume  
 133 is entirely filled with one or the other of the phases).<sup>3</sup> A function  $\chi(x,y,t)$  is defined to  
 134 represent the change in volume fraction. If  $\chi(i,j) = 1$ , the cell  $i,j$  is full of the wetting  
 135 phase, and if  $\chi(i,j) = 0$ , the cell  $i,j$  is full of the non-wetting phase. For function value  
 136 between 0 and 1, the cell contains interface. In a Eulerian calculation, an averaging of  
 137 the flow properties is required to compute the flow of fluid through the mesh, thus the  
 138 density and viscosity become:

$$139 \quad \rho = \chi\rho_1 + (1 - \chi)\rho_2 \quad (S6)$$

$$140 \quad \mu = \chi\mu_1 + (1 - \chi)\mu_2 \quad (S7)$$

141 Subscripts 1 and 2 represent the wetting and non-wetting phases, respectively.

142 Accordingly, the governing equations become:

143 Continuity:

$$144 \quad \frac{\partial(\chi\rho_1)}{\partial t} + \nabla\chi\rho_1u_1 = 0 \quad (S8)$$

$$145 \quad \frac{\partial[(1 - \chi)\rho_2]}{\partial t} + \nabla[(1 - \chi)\rho_2u_2] = 0 \quad (S9)$$

146 Momentum:

$$147 \quad \frac{\partial(\chi\rho_1u_1)}{\partial t} + \nabla[\chi\rho_1u_1u_1] = -\Delta P_1 + \nabla[\chi\mu_1(\nabla u_1 + \nabla u_1^T)] + \chi\rho_1g + \vec{F} \quad (S10)$$

$$148 \quad \frac{\partial[(1 - \chi)\rho_2u_2]}{\partial t} + \nabla[(1 - \chi)\rho_2u_2u_2] =$$

$$149 \quad -\Delta P_2 + \nabla[(1 - \chi)\mu_2(\nabla u_2 + \nabla u_2^T)] + (1 - \chi)\rho_2g + \vec{F} \quad (S11)$$

150 here  $\vec{F}$  is the source term including the contribution of surface tension, which can be  
 151 calculate by the Continuous surface force model (CSF) proposed by Brackbill.<sup>4</sup>

152 After the mesh profile was generated and imported into Fluent, the relevant  
 153 parameters were set and the boundary condition, material properties and solver

parameters were defined as the following:

**Table S1** Key settings for the CFD model

| <b>Boundary conditions</b>      |                                                                              |
|---------------------------------|------------------------------------------------------------------------------|
| Inlet                           | Pressure inlet, 0 Pa. The initial volume fraction of the wetting phase is 1. |
| Outlet                          | Pressure outlet, 0 Pa.                                                       |
| No-flux boundaries              | 0 degree as the contact angle between the wicking liquid and boundaries.     |
| <b>Material properties</b>      |                                                                              |
| Water density $\rho_1$          | 998.2 kg m <sup>-3</sup>                                                     |
| Air density $\rho_2$            | 1.225 kg m <sup>-3</sup>                                                     |
| Water dynamic viscosity $\mu_1$ | 1.003e <sup>-3</sup> kg m <sup>-1</sup> s <sup>-1</sup>                      |
| Air dynamic viscosity $\mu_2$   | 1.7894e <sup>-5</sup> kg m <sup>-1</sup> s <sup>-1</sup>                     |
| <b>Solver parameters</b>        |                                                                              |
| Method                          | SIMPLE                                                                       |
| Analysis type                   | Transient                                                                    |
| Time Step Size                  | 1e <sup>-6</sup> s                                                           |
| Max iterations per loop         | 30                                                                           |
| Total Time steps                | 500                                                                          |

## S2.2 Salt diffusion

### S2.2.1 Geometry and mesh generation

The geometries are created in the software DesignModeler and the software Mesh was used to carried out mesh generation. The sizes of the capillaries and the divided mesh are shown in Fig. S2b. The elements of the model were 4279. Flip the model to form Gradient-OD and Gradient, respectively.

### S2.2.2 Mathematical model and boundary condition

In this section, a CFD model is formulated by the commercial software Fluent 19.0

164 too. In our simulation, the top meniscus is assumed to be a rigid interface because water  
 165 can always be supplied in time under the capillary pressure. Below the meniscus, the  
 166 capillary is filled with sodium chloride aqueous solution. With the evaporation of water  
 167 from the meniscus, the salt left behind leads to a concentration gradient and then the  
 168 salt diffuses down. This process mainly involves two hydrodynamic problems: liquid  
 169 evaporation and species diffusion. We solve the problem by writing UDF files and  
 170 using the Species Transport model of Fluent. In addition, Multiphase (Volume of Fluid)  
 171 was also used in this simulation because the water was supplied by surface tension (See  
 172 section 2.1 for the details). Finally, we considered the process as laminar flow and the  
 173 Energy equation was also used because evaporation involves energy transfer.

174 For the liquid phase, the continuity equation, momentum balance equation and the  
 175 general species transport equation are well known as:

$$176 \quad \frac{\partial \rho \varepsilon_i}{\partial t} + \rho \varepsilon_i \nabla v_i = 0 \quad (S12)$$

$$177 \quad \frac{\partial (\rho \varepsilon_i \rightarrow_v)}{\partial t} = -\varepsilon_i \nabla p - \mu_l \nabla \cdot (\rho \varepsilon_i \rightarrow_{v_i v_i}) + \nabla \cdot \tau \quad (S13)$$

$$178 \quad \frac{\partial}{\partial t} (\rho \varepsilon_i) = -\nabla \cdot \rightarrow_{J_i} - \nabla (\rho \rightarrow_{v_i} \varepsilon_i) + S_i \quad (S14)$$

179 where:

180  $\varepsilon_i$ =local mass fraction of species  $i$ ,

$$181 \quad \sum_{i=1}^2 \varepsilon_i = 1 \quad (S15)$$

182  $\rho$ =the density of the solution;

183  $v_i$  = velocity;

184  $p$  = the pressure of the solution;

185  $\mu_l$ = the liquid dynamic viscosity;

186  $\tau$ = stress tensor;

187  $J_i$ = the diffusion flux of species  $i$ , which arises due to the gradients of concentration

188 and was calculated bases on Fick' law:

189 
$$J_i = -\rho D_i \nabla \varepsilon_i \quad (S16)$$

190  $D_i$ = diffusion coefficient, as for salt, it was set as  $2.88 \times 10^{-5} \text{ m}^2 \text{ s}^{-1}$  for all capillary models

191 so that it won't take so much time to realize a marked concentration change;

192  $S$ = source term due to water evaporation.

193 In our UDF file, by setting a saturation evaporation temperature  $T_{sat}$ , evaporation

194 will occur when the temperature  $T_1$  of the solution is higher than  $T_{sat}$ . The calculation

195 formula of evaporation mass is as follows:

196 
$$m = h_m \rho \varepsilon_w \left| \frac{T_1 - T_{sat}}{T_{sat}} \right| \quad (S17)$$

197 where  $h_m$  is the evaporation coefficient and was set as 1.5,  $\varepsilon_w$  is the mass fraction of  
198 water.

199 Then, the boundary conditions were set in Fluent. The inlet was set as pressure inlet  
200 with 0 static pressure so that the solution was transported by surface tension without  
201 any external pressure. The outlet was set as pressure outlet without any flow so that the  
202 water is loss by evaporation only. As for two side walls, they were set as hydrophilic  
203 wall with a contact angle of  $70^\circ$ . The capillaries were pre-wetted with the mixture  
204 solution before the calculation and the initial mass fraction of salt was set as 5 %. For  
205 evaporation, the  $T_{sat}$  was set as 285 K and the initial temperature of the solution was  
206 set as 300 K.

207 Finally, the problem was solved by Fluent with a transient calculation model and  
208 the Time Step size was set as  $2 \times 10^{-7} \text{ s}$  to ensure convergence and high accuracy. In our  
209 calculation, the crystallization of salt wasn't considered because the transport time is  
210 short enough that the concentration won't reach the crystallization concentration (26.52  
211 %)

212

213 **S3 Supplementary Figures and Tables**

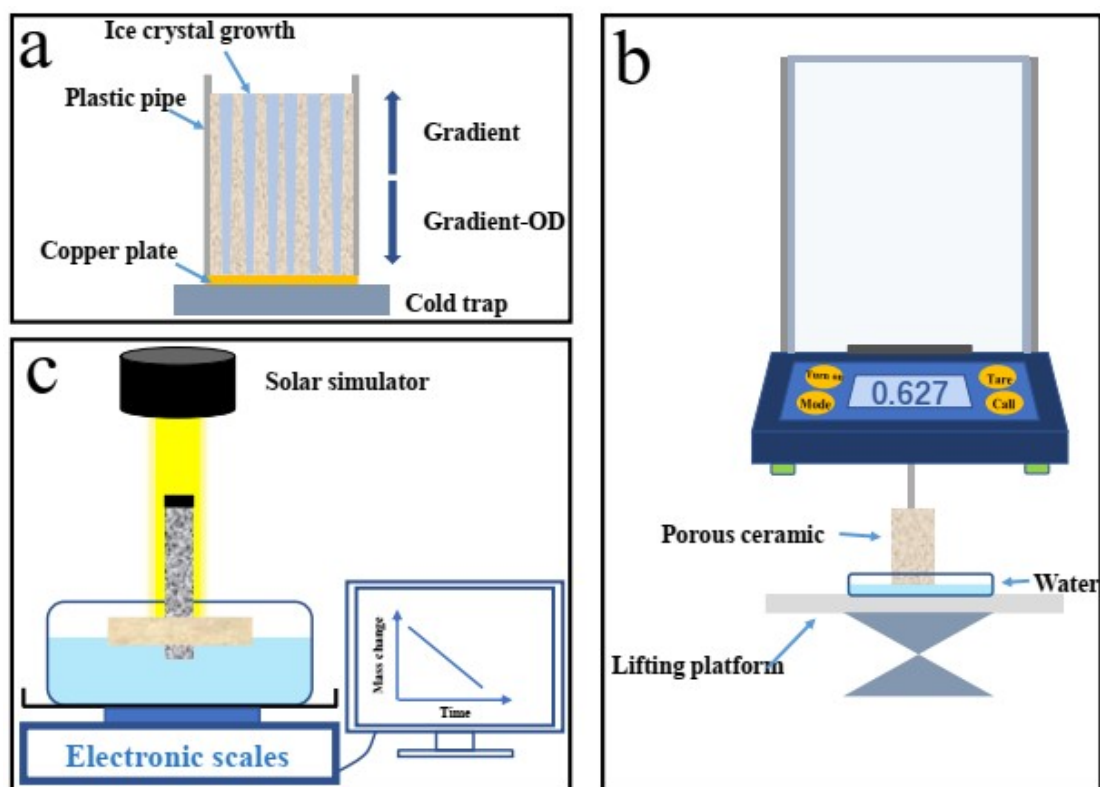

**Fig. S1** Schematic diagram of: (a) Slurry freezing. (b) Water absorption. (c) Evaporation test.

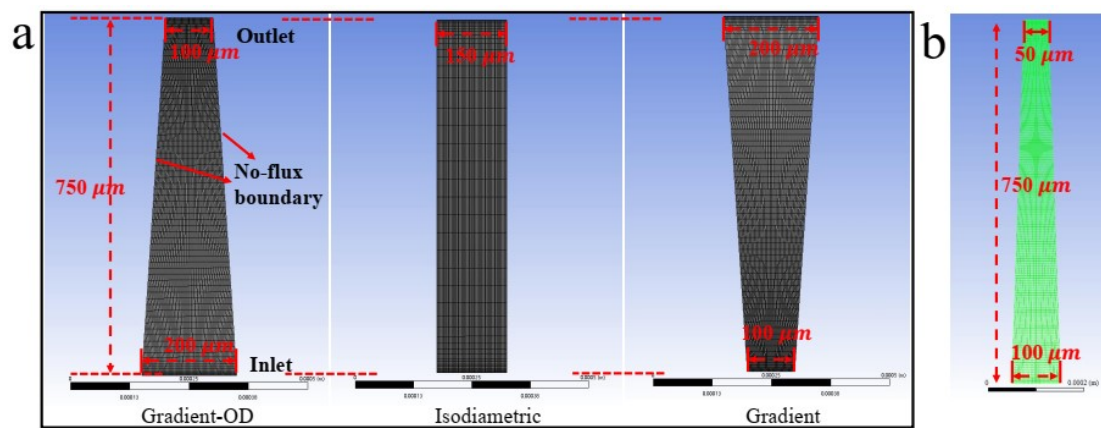

**Fig. S2** The geometries and meshes of: (a) Capillary suction. (b) Salt diffusion.

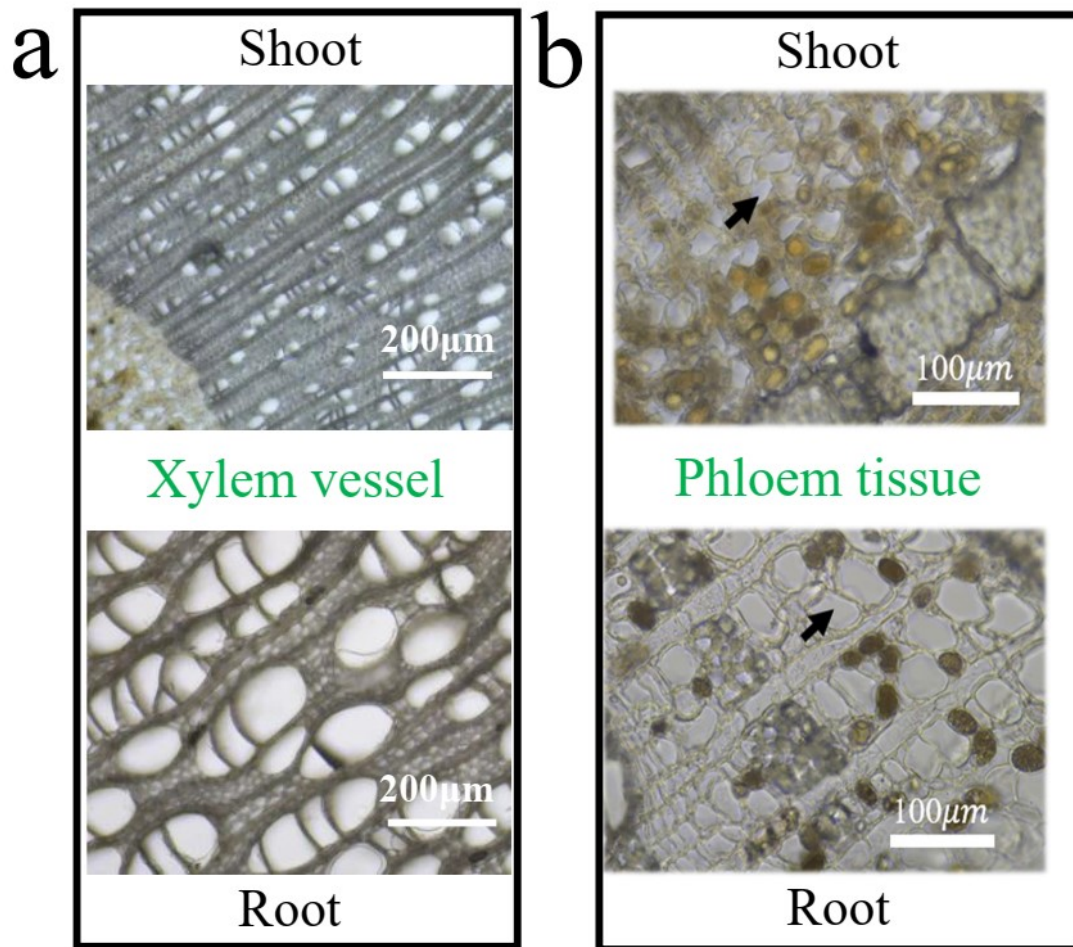

**Fig. S3** (a) Xylem vessel and (b) Phloem tissue micrographs of current year growth from a wide diameter root and a narrow shoot of poplar trees

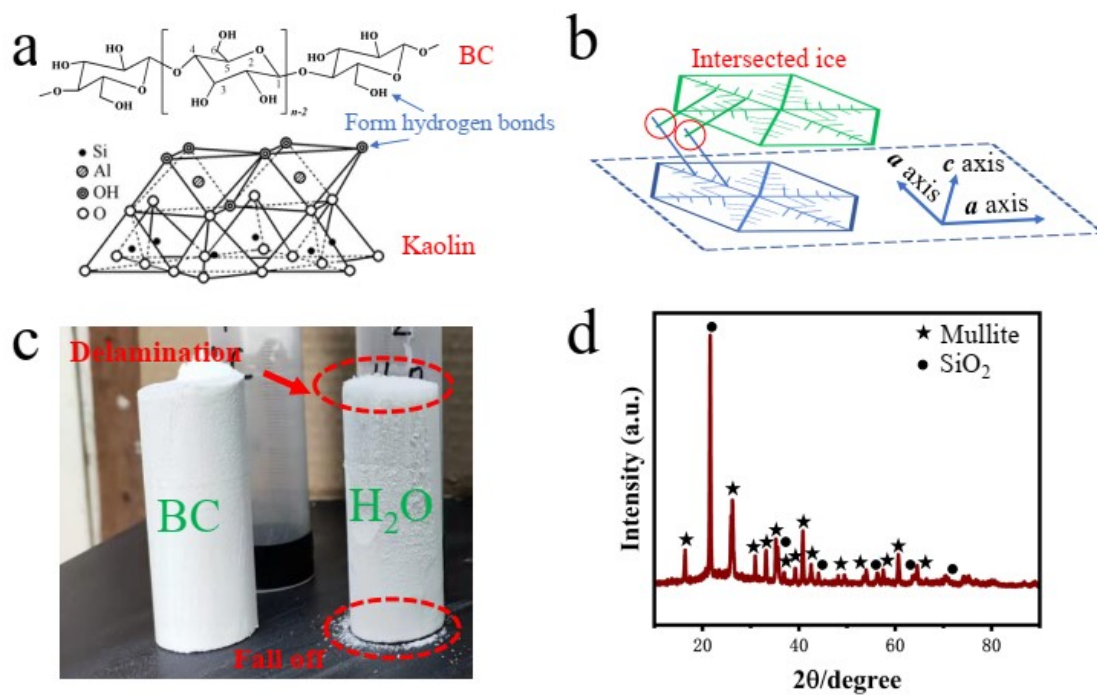

225  
 226 **Fig. S4** (a) Structure of Kaolin and BC. (b) The diagram of the growth of ice crystals.  
 227 (c) Dry billets. (d) XRD pattern of the porous ceramic.  
 228

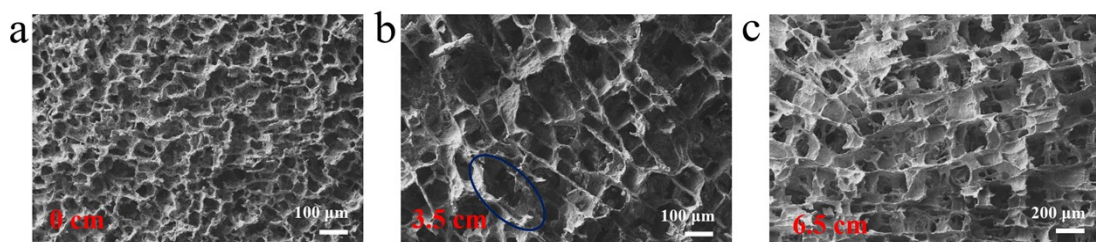

**Fig. S5** (a-c) SEM picture of the cross-sections at different heights of the ceramic with a solid content of 15 wt% prepared at -45 °C.

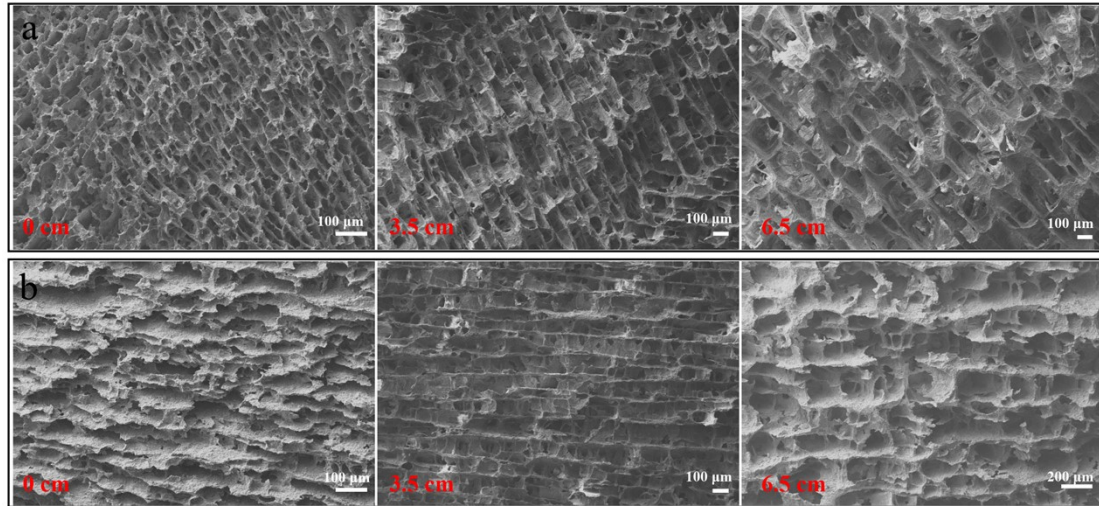

233

234 **Fig. S6** SEM picture of the (a) cross-sections and (b) longitudinal section at different

235 heights of the ceramic with a solid content of 20 wt% prepared at -45 °C.

236

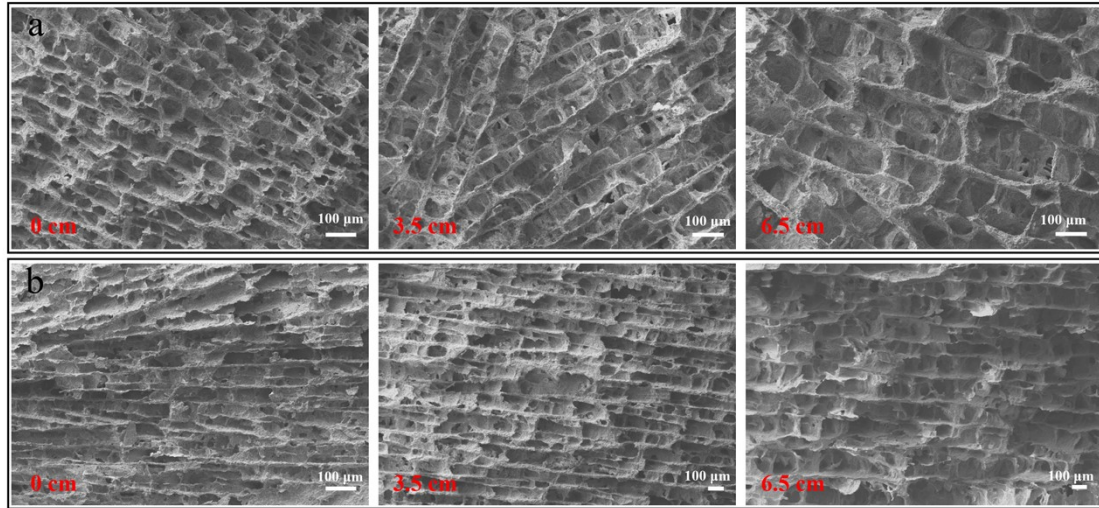

237

238 **Fig. S7** SEM picture of the (a) cross-sections and (b) longitudinal section at different

239 heights of the ceramic with a solid content of 25 wt% prepared at -45 °C.

240

241 **Table S2** The average open porosity of different porous ceramics

| Solid content         | 15 wt% | 20 wt % | 25 wt % |
|-----------------------|--------|---------|---------|
| Average open porosity | 0.805  | 0.767   | 0.744   |

242

243

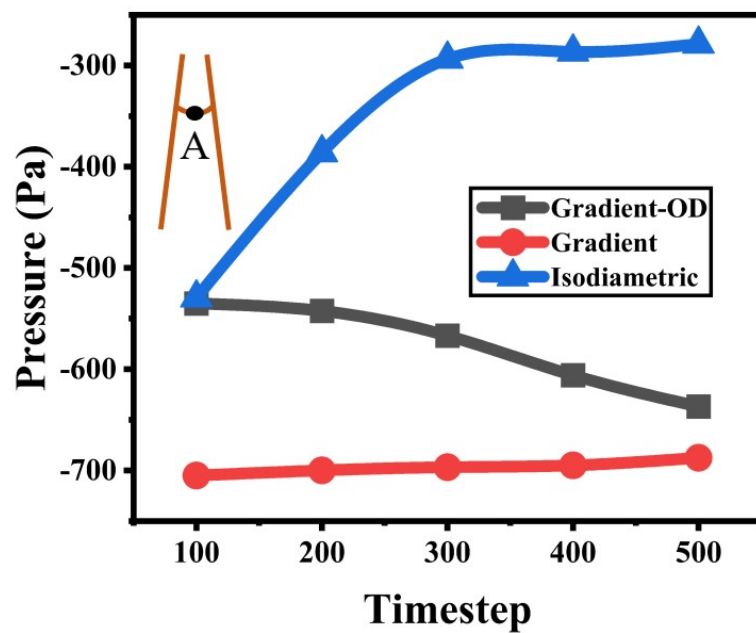

244

245 **Fig. S8** The simulated changes of pressure of point A at the bottom of the meniscus of  
 246 different capillaries.

247

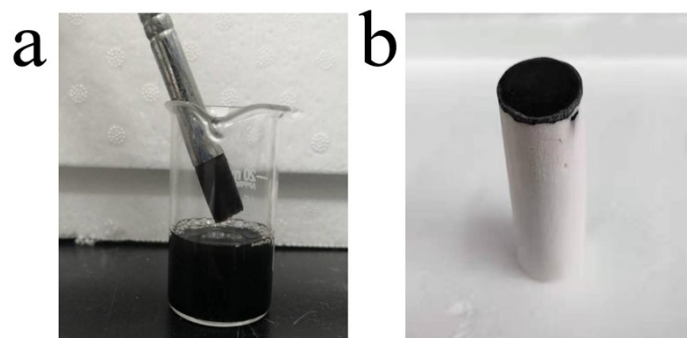

248

249 **Fig. S9** (a) Digital images of MGO dispersion. (b) Porous ceramics coated with MGO.

250

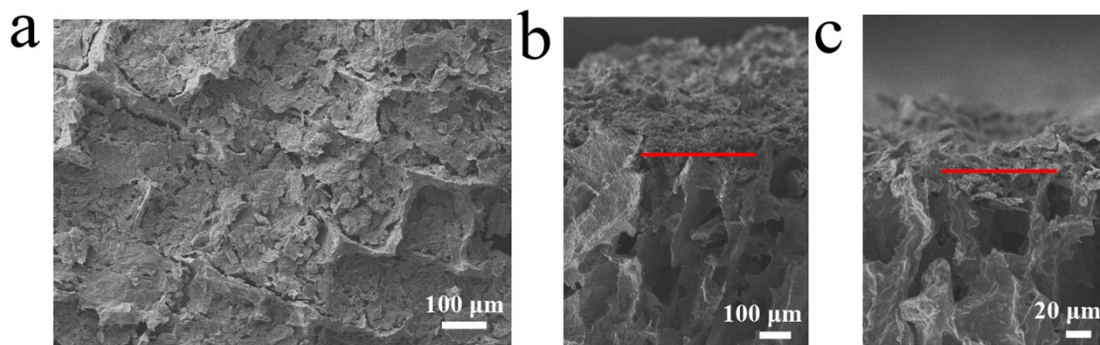

**Fig. S10** (a) SEM picture of the cross-section of the MGO covered on the surface of the Gradient porous ceramic. SEM picture of the longitudinal section of the MGO covered on the surface of the: (b) Gradient porous ceramic. (c) Gradient-OD porous ceramic.

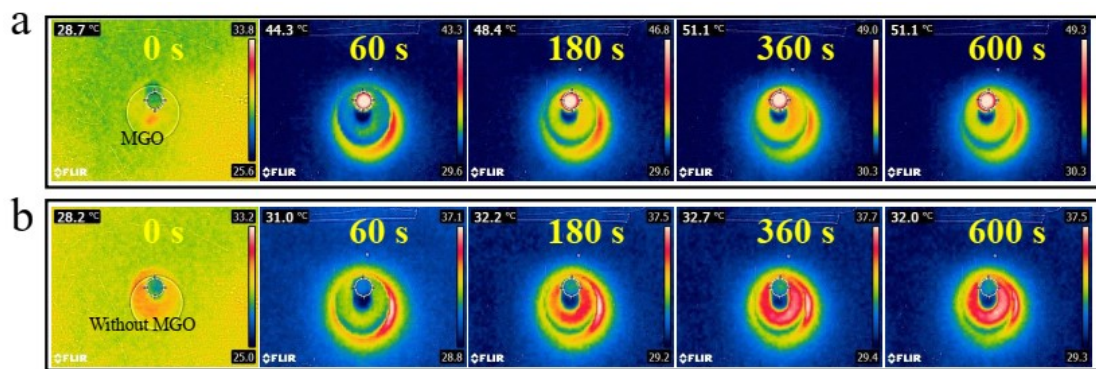

**Fig. S11** (a, b) The infrared thermographs of temperature change.

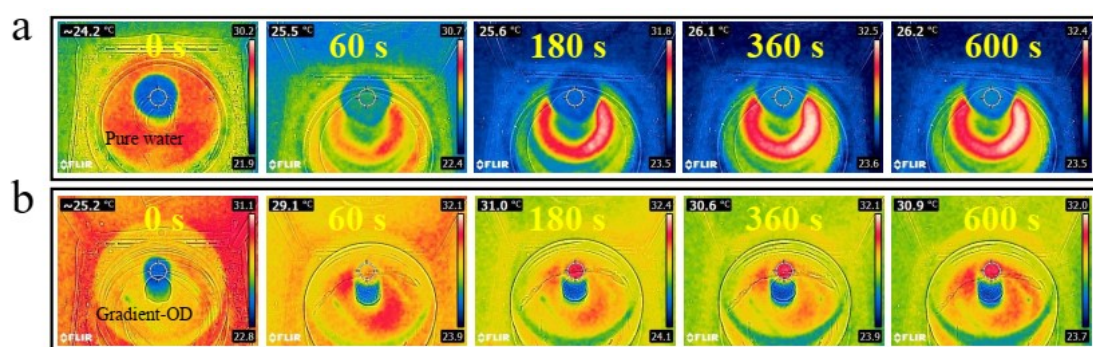

**Fig. S12** (a, b) The infrared thermographs of temperature change.

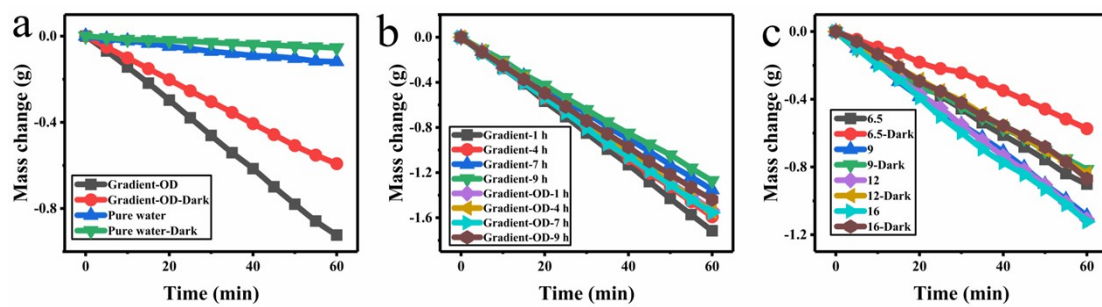

**Fig. S13 (a-c)** The mass change.

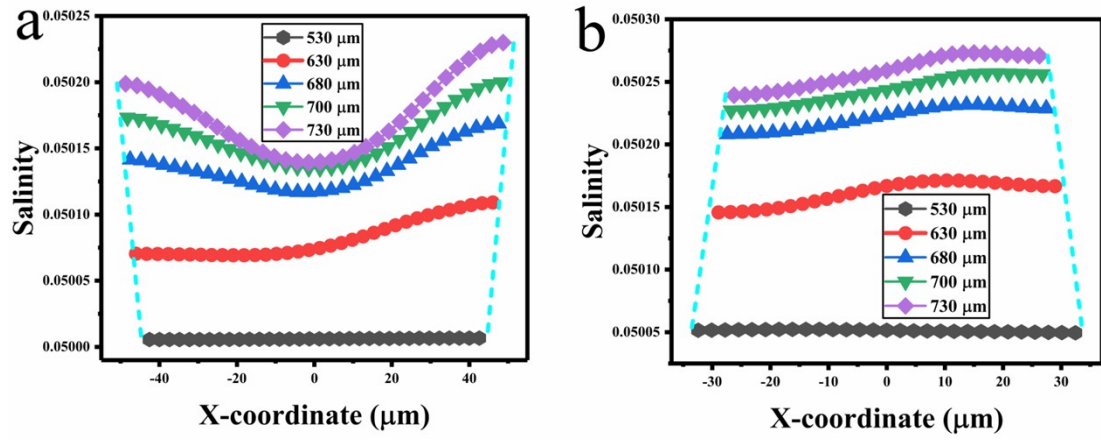

266  
 267 **Fig. S14** The variation of salinity with the X-coordinate at different heights of (a) Gradient tube  
 268 and (b) Gradient-OD tube.  
 269

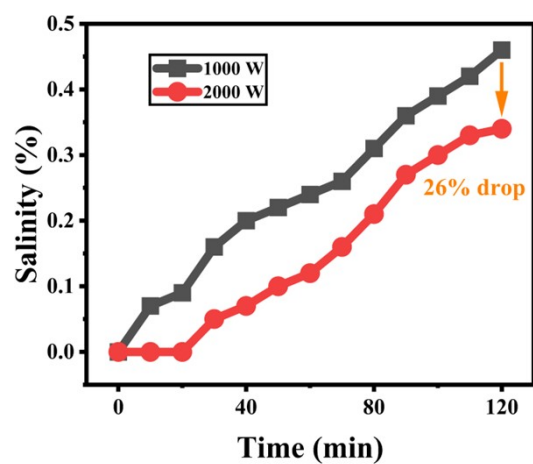

270

271 **Fig. S15** The variation of salinity of bulk water under different irradiation with

272 Gradient porous ceramic

273

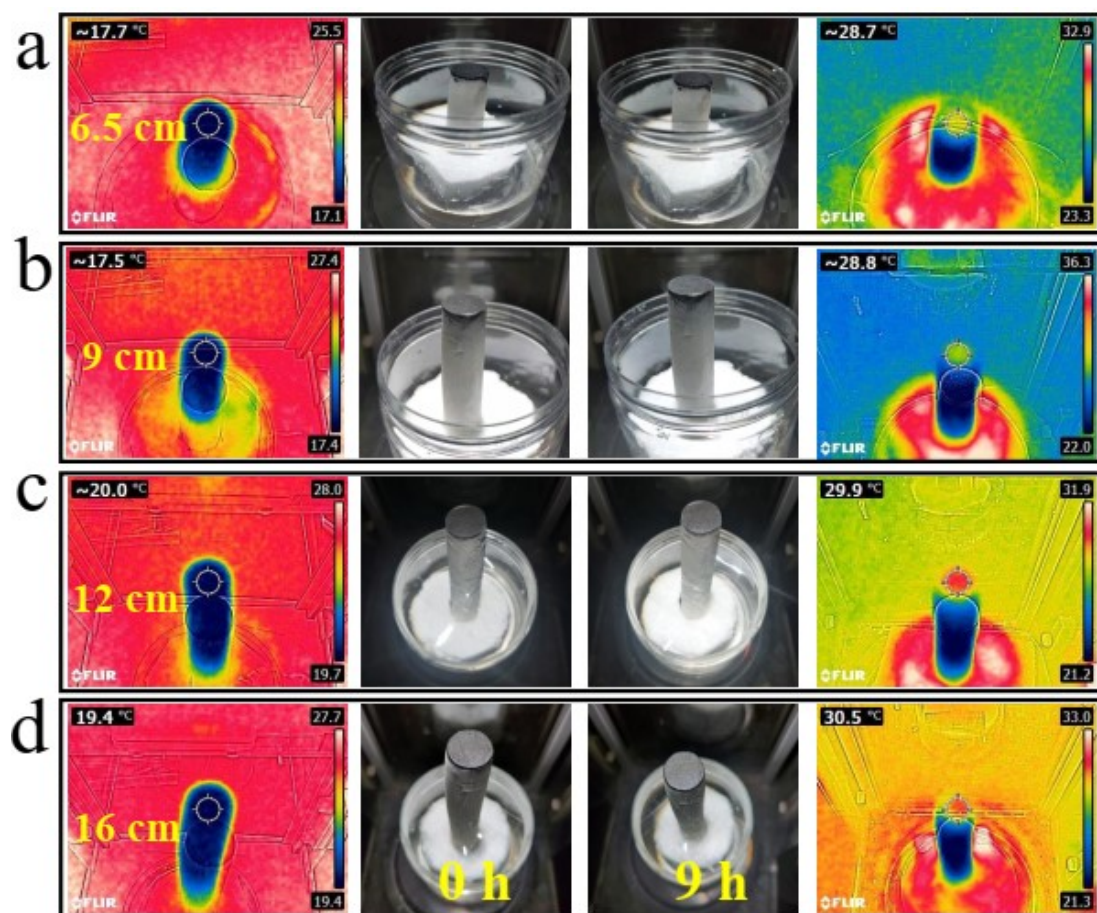

274

275 **Fig. S16** The infrared thermographs of temperature change and the digital photos of

276

the evaporation surface before and after evaporation.

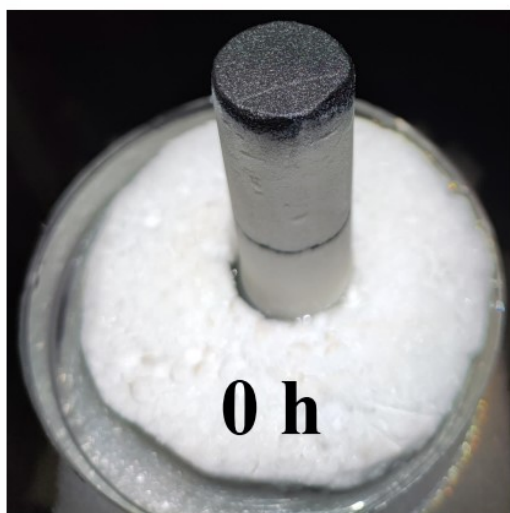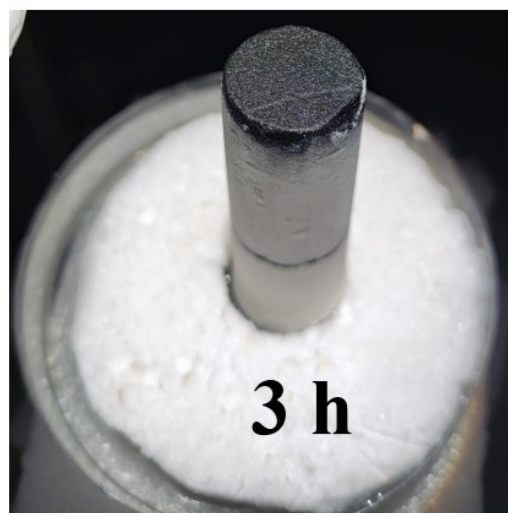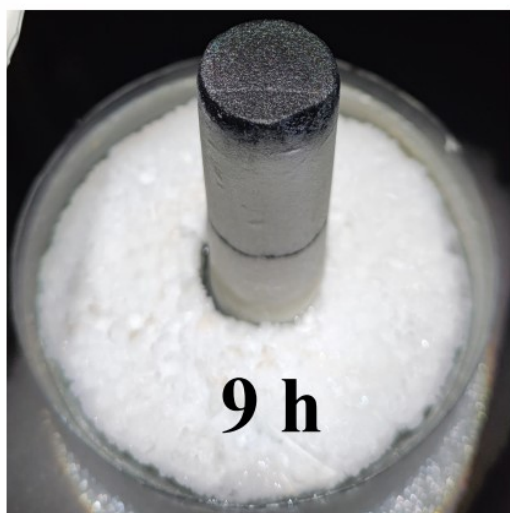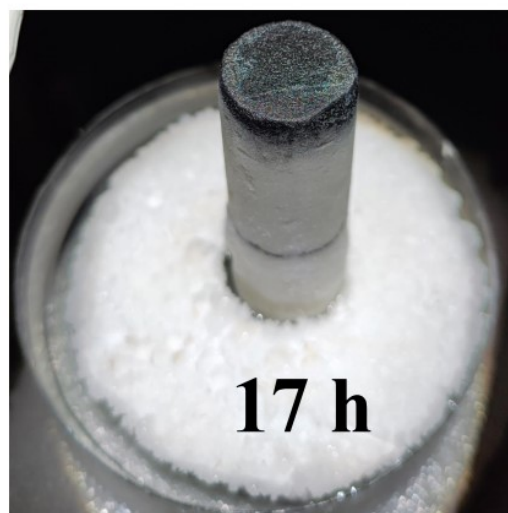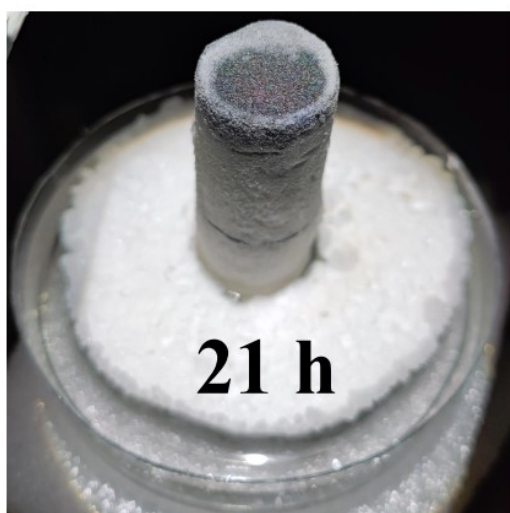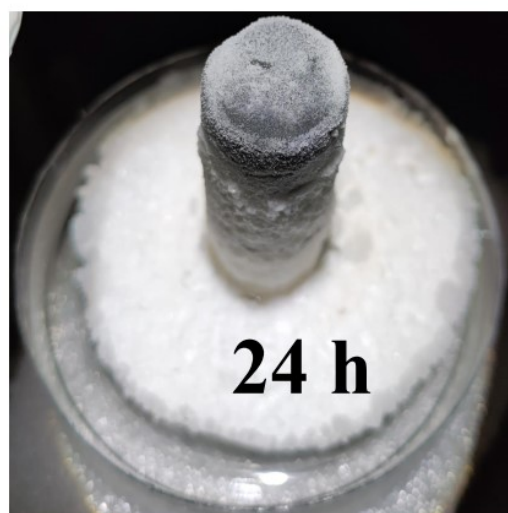

277

278

279

**Fig. S17** Image of salt crystal in the surface of the evaporator after different evaporation time.

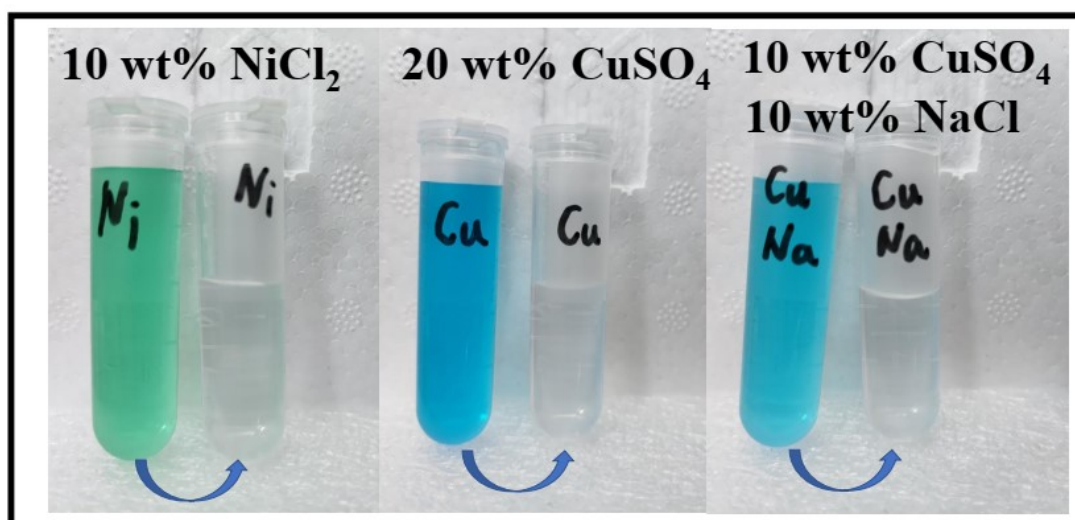

**Fig. S18** Schematic diagram of the solution before and after treatment.

**Table S3** Comparing various wood-based or tree-inspired evaporators under 1 sun illumination.

| Species                                                | Length of evaporators (cm) | Evaporation rate (kg·m <sup>-2</sup> ·h <sup>-1</sup> ) | Efficiencies (%) | Brine salinity (wt%) | Ref.      |
|--------------------------------------------------------|----------------------------|---------------------------------------------------------|------------------|----------------------|-----------|
| Porous ceramic coated with MGO                         | 6.5                        | 3.28                                                    | 80               | 23                   | This work |
| Bilayer wood with surface carbonization                | 3                          | about 1                                                 | 57.3             | 1.05                 | 5         |
| Carbonized bilayer wood with bimodal porous structure  | 0.45                       | 0.8                                                     | 57               | 15                   | 6         |
| Radially, hierarchically structured aerogels           | 5                          | 2                                                       | 85.7             | null                 | 7         |
| Chinese ink coating wood with drilling holes           | 2.5                        | 1.6                                                     | 74               | 3.5                  | 8         |
| Wood coated with polydopamine and silver nanoparticles | 4.5                        | 1.58                                                    | 88.6             | 0.97                 | 9         |
| Wood-derived aerogel coated with Au-rGO                | null                       | 1.394                                                   | 90.1             | 3                    | 10        |
| Fe <sub>3</sub> O <sub>4</sub> coated delignified wood | 3                          | 1.3                                                     | 73               | 3.5                  | 11        |

## 287 **S4 References**

- 288 1 C. Hirt, and B. Nichols, *J. Comput. Phys.*, 1981, **39**, 201-225.
- 289 2 J. Pilliod and E. Puckett, *J. Comput. Phys.*, 2004, **199**, 465-502.
- 290 3 W. Rider and D. Kothe, *J. Comput. Phys.*, 1997, **141**, 112-152.
- 291 4 J. Brackbill, D. Kothe and C. Zemach, *J. Comput. Phys.*, 1992, **100**, 335-354.
- 292 5 M. Zhu, Y. Li, G. Chen, F. Jiang, Z. Yang, X. Luo, Y. Wang, S. Lacey, J. Dai, C.
- 293 Wang, C. Jia, J. Wan, Y. Yao, A. Gong, B. Yang, Z. Yu, S. Das and L. Hu, *Adv.*
- 294 *Mater.*, **29**, 1704107.
- 295 6 S. He, C. Chen, Y. Kuang, R. Mi, Y. Liu, Y. Pei, W. Kong, W. Gan, H. Xie, E. Hitz,
- 296 C. Jia, X. Chen, A. Gong, J. Liao, J. Li, Z. Ren, B. Yang, D. Siddhartha and L. Hu,
- 297 *Energy Environ. Sci.*, 2019, **12**, 1558-1567.
- 298 7 W. Xu, Y. Xing, J. Liu, H. Wu, Y. Cui, D. Li, D. Guo, C. Li, A. Liu and H. Bai,
- 299 *ACS Nano*, 2019, **13**, 7930-7938.
- 300 8 X. Zhang, Z. Wang, L. Song, Y. Feng and J. Yao, *Desalination*, 2020, **496**, 114727.
- 301 9 J. Yang, Y. Chen, X. Jia, Y. Li, S. Wang and H. Song, *ACS Appl. Mater. Interfaces*,
- 302 2020, **12**, 47029–47037.
- 303 10 Q. Zhang, L. Li, B. Jiang, H. Zhang, N. He, S. Yang, D. Tang and Y. Song, *ACS*
- 304 *Appl. Mater. Interfaces*, 2020, **12 (25)**, 28179–28187.
- 305 11 L. Song, X. Zhang, Z. Wang, T. Zhang and J. Yao, *Desalination*, 2021, **507**,
- 306 115024.
